# Supplementary material
Source: ML conference proceedings conference paper supplement (https://proceedings.mlr.press/v80/boracchi18a.html)
Supplement: Supplementary file [file boracchi18a-supp.pdf]

**QuantTree: Histograms for Change Detection in Multivariate Data Streams (Supplementary Materials)**

This document provides additional results that were omitted from the main document due to space restrictions. In particular, we report in Tables 1 - 4 the average FPR and test power values that are otherwise represented as dots in Figures 2 (in the main document) and Figure 1 (in the Appendix). Figure 1 (in the Appendix) portrays the detection performance in the *large TR* configuration.

Table 2: Average values of FPR computed on the Gaussian Dataset.

| $N$   | $K$ | $d$ | Pearson's Distr. Free | Pearson Asym. | TV Distr. Free | TV Bootstrap | Voronoi | Density Tree | Parametric |
|-------|-----|-----|-----------------------|---------------|----------------|--------------|---------|--------------|------------|
| 4096  | 32  | 2   | 0.04                  | 0.06          | 0.04           | 0.04         | 0.06    | 0.06         | 0.07       |
| 4096  | 32  | 8   | 0.04                  | 0.06          | 0.04           | 0.04         | 0.06    | 0.06         | 0.07       |
| 4096  | 32  | 32  | 0.04                  | 0.06          | 0.04           | 0.04         | 0.05    | 0.06         | 0.06       |
| 4096  | 32  | 64  | 0.04                  | 0.06          | 0.04           | 0.04         | 0.06    | 0.06         | 0.06       |
| 4096  | 128 | 2   | 0.05                  | 0.07          | 0.04           | 0.05         | 0.07    | 0.06         | 0.07       |
| 4096  | 128 | 8   | 0.05                  | 0.07          | 0.04           | 0.04         | 0.07    | 0.06         | 0.06       |
| 4096  | 128 | 32  | 0.05                  | 0.07          | 0.04           | 0.05         | 0.06    | 0.06         | 0.05       |
| 4096  | 128 | 64  | 0.05                  | 0.07          | 0.04           | 0.05         | 0.05    | 0.06         | 0.06       |
| 16384 | 32  | 2   | 0.05                  | 0.06          | 0.04           | 0.04         | 0.05    | 0.06         | 0.07       |
| 16384 | 32  | 8   | 0.05                  | 0.06          | 0.04           | 0.04         | 0.06    | 0.06         | 0.07       |
| 16384 | 32  | 32  | 0.05                  | 0.06          | 0.04           | 0.05         | 0.05    | 0.05         | 0.08       |
| 16384 | 32  | 64  | 0.05                  | 0.06          | 0.04           | 0.05         | 0.05    | 0.06         | 0.07       |
| 16384 | 128 | 2   | 0.05                  | 0.07          | 0.04           | 0.05         | 0.07    | 0.06         | 0.07       |
| 16384 | 128 | 8   | 0.05                  | 0.07          | 0.04           | 0.05         | 0.06    | 0.06         | 0.06       |
| 16384 | 128 | 32  | 0.05                  | 0.07          | 0.04           | 0.05         | 0.06    | 0.06         | 0.07       |
| 16384 | 128 | 64  | 0.05                  | 0.06          | 0.04           | 0.05         | 0.06    | 0.06         | 0.07       |

Table 3: Average values of test power computed on the Gaussian Dataset.

| $N$   | $K$ | $d$ | Pearson's Distr. Free | Pearson Asym. | TV Distr. Free | TV Bootstrap | Voronoi | Density Tree | Parametric |
|-------|-----|-----|-----------------------|---------------|----------------|--------------|---------|--------------|------------|
| 4096  | 32  | 2   | 0.93                  | 0.94          | 0.85           | 0.83         | 0.94    | 0.79         | 0.73       |
| 4096  | 32  | 8   | 0.46                  | 0.51          | 0.34           | 0.32         | 0.28    | 0.22         | 0.37       |
| 4096  | 32  | 32  | 0.14                  | 0.17          | 0.11           | 0.10         | 0.08    | 0.10         | 0.15       |
| 4096  | 32  | 64  | 0.09                  | 0.12          | 0.07           | 0.06         | 0.06    | 0.08         | 0.11       |
| 4096  | 128 | 2   | 0.81                  | 0.84          | 0.66           | 0.67         | 0.83    | 0.76         | 0.72       |
| 4096  | 128 | 8   | 0.38                  | 0.43          | 0.25           | 0.26         | 0.24    | 0.23         | 0.35       |
| 4096  | 128 | 32  | 0.14                  | 0.18          | 0.09           | 0.10         | 0.08    | 0.10         | 0.15       |
| 4096  | 128 | 64  | 0.10                  | 0.13          | 0.07           | 0.07         | 0.06    | 0.08         | 0.10       |
| 16384 | 32  | 2   | 1.00                  | 1.00          | 1.00           | 1.00         | 1.00    | 0.95         | 1.00       |
| 16384 | 32  | 8   | 0.92                  | 0.93          | 0.89           | 0.90         | 0.74    | 0.59         | 0.91       |
| 16384 | 32  | 32  | 0.49                  | 0.52          | 0.36           | 0.37         | 0.16    | 0.20         | 0.48       |
| 16384 | 32  | 64  | 0.27                  | 0.29          | 0.18           | 0.19         | 0.10    | 0.13         | 0.28       |
| 16384 | 128 | 2   | 1.00                  | 1.00          | 1.00           | 1.00         | 1.00    | 1.00         | 1.00       |
| 16384 | 128 | 8   | 0.95                  | 0.96          | 0.84           | 0.85         | 0.75    | 0.69         | 0.92       |
| 16384 | 128 | 32  | 0.47                  | 0.51          | 0.29           | 0.32         | 0.16    | 0.20         | 0.47       |
| 16384 | 128 | 64  | 0.24                  | 0.28          | 0.13           | 0.16         | 0.09    | 0.12         | 0.28       |

Table 4: Average values of FPR computed on the real-world datasets.

| $N$   | $K$ | Pearson's Distr. Free | Pearson Asym. | TV Distr. Free | TV Bootstrap | Voronoi | Density Tree |
|-------|-----|-----------------------|---------------|----------------|--------------|---------|--------------|
| 4096  | 32  | 0.04                  | 0.06          | 0.05           | 0.04         | 0.06    | 0.06         |
| 4096  | 128 | 0.05                  | 0.07          | 0.04           | 0.05         | 0.07    | 0.06         |
| 16384 | 32  | 0.05                  | 0.06          | 0.04           | 0.05         | 0.06    | 0.06         |
| 16384 | 128 | 0.05                  | 0.06          | 0.04           | 0.06         | 0.07    | 0.07         |

Table 5: Average values of test power computed on the real-world datasets.

| $N$   | $K$ | Pearson's Distr. Free | Pearson Asym. | TV Distr. Free | TV Bootstrap | Voronoi | Density Tree |
|-------|-----|-----------------------|---------------|----------------|--------------|---------|--------------|
| 4096  | 32  | 0.46                  | 0.49          | 0.38           | 0.38         | 0.06    | 0.18         |
| 4096  | 128 | 0.61                  | 0.64          | 0.52           | 0.52         | 0.07    | 0.26         |
| 16384 | 32  | 0.80                  | 0.81          | 0.73           | 0.73         | 0.07    | 0.31         |
| 16384 | 128 | 0.88                  | 0.90          | 0.81           | 0.83         | 0.08    | 0.59         |

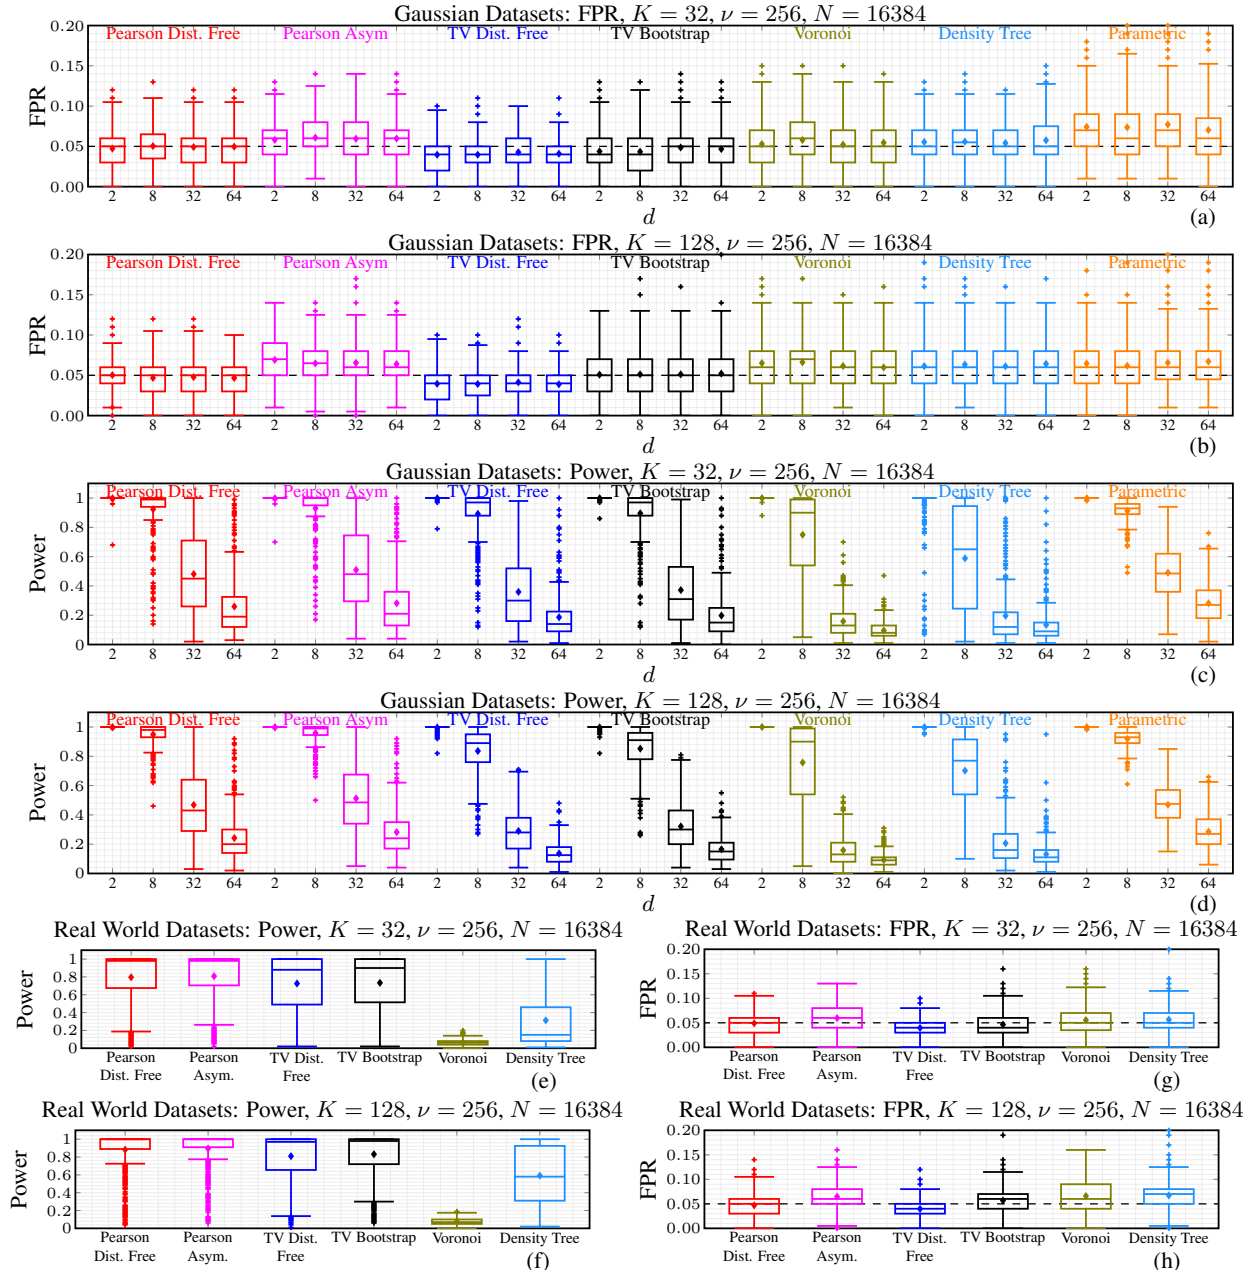

Figure 3: Results on synthetically generated and real world datasets using the large TR configuration. The larger values of  $N$  and  $\nu$  guarantee higher power and a better control of the FPR than in small TR configuration. Qualitatively, we see the same trends as in Figure 2.
